# Supplementary material for: Novel roles of TMEM100: inhibition metastasis and proliferation of hepatocellular carcinoma
Source: PubMed Central journal article supplement (PMC4627315; doi:10.18632/oncotarget.3954), 2015-04-29
Supplement: oncotarget-06-17379-s001.pdf [file oncotarget-06-17379-s001.pdf]

## Novel roles of TMEM100: inhibition metastasis and proliferation of hepatocellular carcinoma

### Supplementary Material

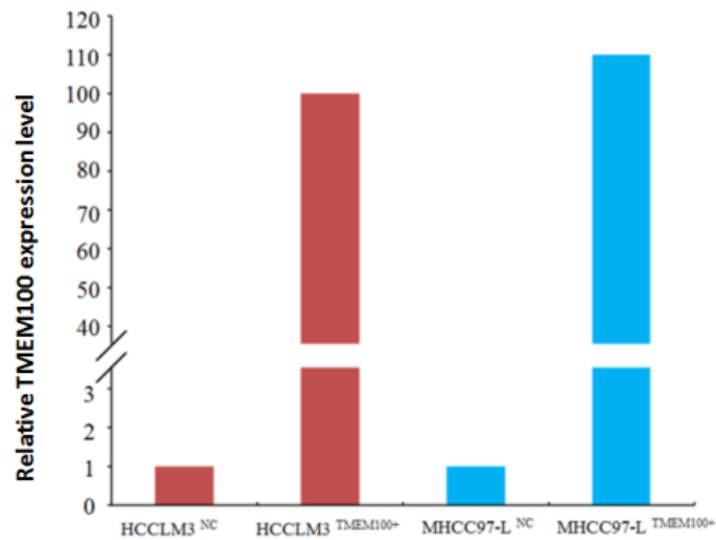

**Supplementary Figure 1:** The relative expression level of TMEM100 in HCCLM3<sup>NC</sup>, HCCLM3<sup>TMEM100+</sup>, MHCC97-L<sup>NC</sup> and MHCC97-L<sup>TMEM100+</sup> cells. The expression of TMEM100 was significantly overexpressed in HCCLM3<sup>TMEM100+</sup> and MHCC97-L<sup>TMEM100+</sup> cells compared to HCCLM3<sup>NC</sup> and MHCC97-L<sup>NC</sup> cells ( $p < 0.05$ ).
